# Supplementary material for: Multi-clonal evolution of multi-drug-resistant/extensively drug-resistant Mycobacterium tuberculosis in a high-prevalence setting of Papua New Guinea for over three decades
Source: PubMed Central journal article supplement (PMC5857374; doi:10.1099/mgen.0.000147), 2018-01-04
Supplement: mgen-4-147-s001.pdf [file mgen-4-147-s001.pdf]

**Figure S1:** MIRU-24 minimum spanning tree of *M. tuberculosis* isolates collected from Daru Island, Papua New Guinea constructed using Bionumerics v6.7. Sectioned circles represent two or more isolates that share identical allele profiles. Values on the branches represent allelic difference between isolates. Green-dominant cluster (244252352644425163353824), Red-minor cluster, Purple-unique isolates

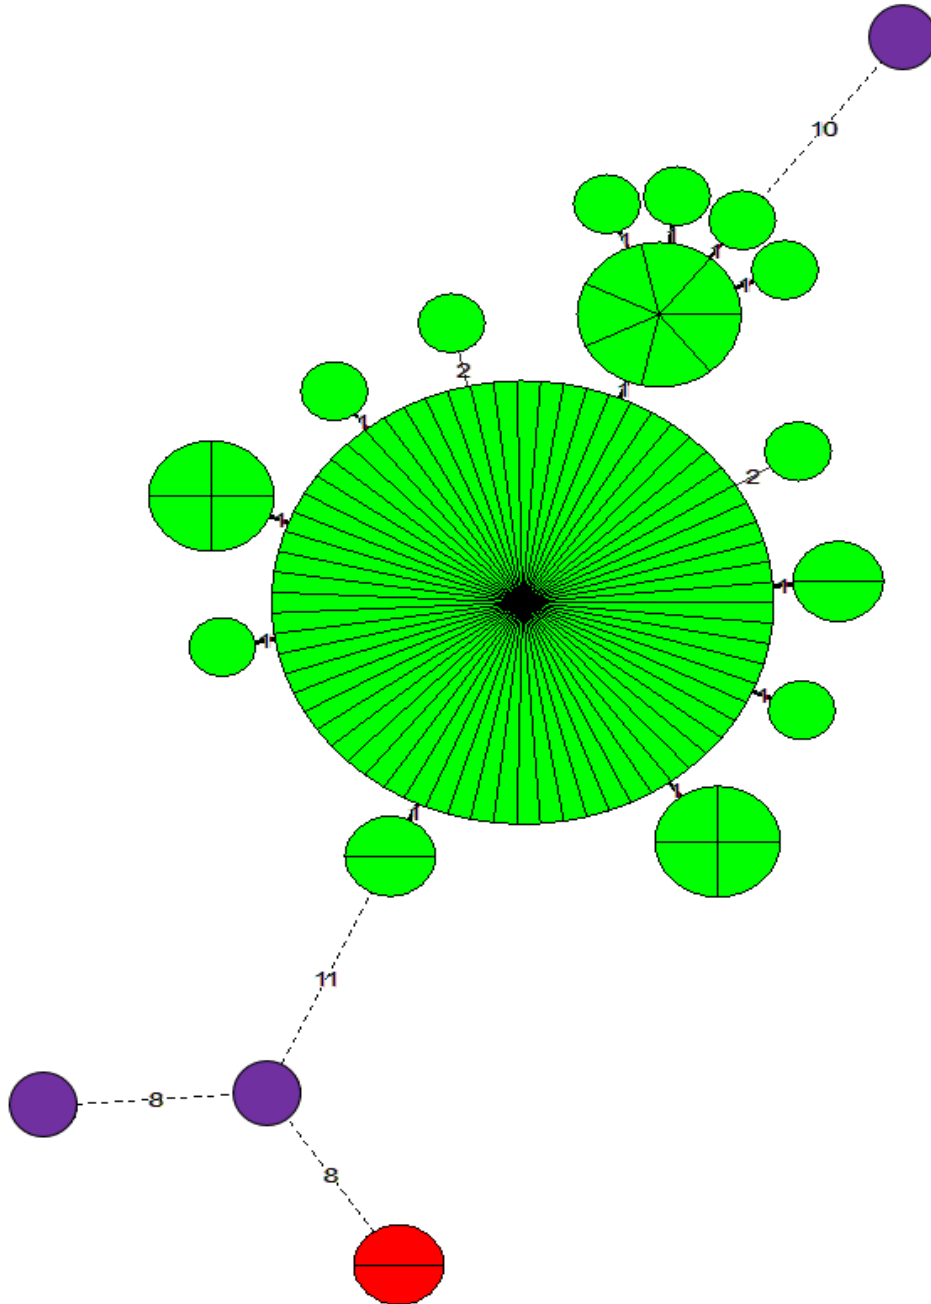

**Table S1:** list of some known resistance conferring genes and compensatory genes

|       |              | Drugs                   |             |             |             |                  |                   |              |                     |              |             |             |               |             |             |                |
|-------|--------------|-------------------------|-------------|-------------|-------------|------------------|-------------------|--------------|---------------------|--------------|-------------|-------------|---------------|-------------|-------------|----------------|
|       | RIF          | INH                     | ETB         | PZA         | STM         | ETH              | OFX               | AMK          | KAN                 | CAP          | DCS         | PAS         | BDQ           | LZD         | DLM         | CFM            |
| Genes | <i>rpoB</i>  | <i>inhA</i><br>promoter | <i>embB</i> | <i>pncA</i> | <i>rpsL</i> | <i>fabG-inhA</i> | <i>gyrA/gyrA*</i> | <i>rrs</i>   | <i>eis</i> promoter | <i>tlyA</i>  | <i>alr</i>  | <i>ribD</i> | <i>atpE</i>   | <i>rrl</i>  | <i>fgdI</i> | <i>Rv0678</i>  |
|       | <i>rpoC*</i> | <i>inhA</i>             | <i>embC</i> | <i>rpsA</i> | <i>gidB</i> | <i>ethA</i>      | <i>gyrB</i>       | <i>whiB7</i> | <i>whiB7</i>        | <i>whiB7</i> | <i>ddl</i>  | <i>thyA</i> | <i>Rv0678</i> | <i>rplC</i> | <i>ddn</i>  | <i>Rv1979c</i> |
|       | <i>rpoA*</i> | <i>katG</i>             | <i>embA</i> | <i>panD</i> | <i>rrs</i>  | <i>ethR</i>      |                   | <i>gidB</i>  | <i>rrs</i>          | <i>rrs</i>   | <i>cycA</i> | <i>dfrA</i> |               |             | <i>fbiA</i> | <i>Rv2535c</i> |
|       |              | <i>ndh</i>              | <i>ubiA</i> |             |             |                  |                   |              | <i>gidB</i>         |              | <i>gidB</i> |             | <i>folC</i>   |             | <i>fbiB</i> |                |
|       |              | <i>furA</i>             | <i>embR</i> |             |             |                  |                   |              |                     |              |             |             |               |             | <i>fbiC</i> |                |
|       |              | <i>oxyR</i>             | <i>iniA</i> |             |             |                  |                   |              |                     |              |             |             |               |             |             |                |
|       |              | <i>aphC</i>             | <i>iniC</i> |             |             |                  |                   |              |                     |              |             |             |               |             |             |                |
|       |              | <i>fadE24</i>           | <i>manB</i> |             |             |                  |                   |              |                     |              |             |             |               |             |             |                |
|       |              | <i>srmR</i>             |             |             |             |                  |                   |              |                     |              |             |             |               |             |             |                |
|       |              | <i>kasA</i>             |             |             |             |                  |                   |              |                     |              |             |             |               |             |             |                |
|       | <i>mshA</i>  |                         |             |             |             |                  |                   |              |                     |              |             |             |               |             |             |                |

Resistance conferring genes for RIF-rifampicin, INH-isoniazid, ETB-ethambutol, PZA-pyrazinamide, STM-streptomycin, ETH-ethionamide, OFX-ofloxacin, AMK-amikacin, KAN-kanamycin, CAP-capreomycin, DCS-cycloserine, PAS-para-aminosalicylic acid, BDQ-bedaquiline, LZD-linezolid, DLM-delamanid, CFM-clofazimine

\*Known compensatory genes

Publications used to identify these genes include

1. Ramaswamy, S. V., Dou, S. J., Rendon, A., Yang, Z., Cave, M. D., & Graviss, E. A. (2004). Genotypic analysis of multidrug-resistant Mycobacterium tuberculosis isolates from Monterrey, Mexico. *J Med Microbiol*, 53(Pt 2), 107-113. doi: 10.1099/jmm.0.05343-0
2. Bloemberg, G. V., Keller, P. M., Stucki, D., Trauner, A., Borrell, S., Latshang, T., . . . Bottger, E. C. (2015). Acquired Resistance to Bedaquiline and Delamanid in Therapy for Tuberculosis. *N Engl J Med*, 373(20), 1986-1988. doi: 10.1056/NEJMc1505196
3. Comas, I., Borrell, S., Roetzer, A., Rose, G., Malla, B., Kato-Maeda, M., . . . Gagneux, S. (2012). Whole-genome sequencing of rifampicin-resistant Mycobacterium tuberculosis strains identifies compensatory mutations in RNA polymerase genes. *Nat Genet*, 44(1), 106-110. doi: 10.1038/ng.1038
4. Jnawali, H. N., Yoo, H., Ryoo, S., Lee, K. J., Kim, B. J., Koh, W. J., . . . Park, Y. K. (2013). Molecular genetics of Mycobacterium tuberculosis resistant to aminoglycosides and cyclic peptide capreomycin antibiotics in Korea. *World J Microbiol Biotechnol*, 29(6), 975-982. doi: 10.1007/s11274-013-1256-x
5. Mathys, V., Wintjens, R., Lefevre, P., Bertout, J., Singhal, A., Kiass, M., . . . Bifani, P. (2009). Molecular genetics of para-aminosalicylic acid resistance in clinical isolates and spontaneous mutants of Mycobacterium tuberculosis. *Antimicrob Agents Chemother*, 53(5), 2100-2109. doi: 10.1128/AAC.01197-08

6. Koser, C. U., Bryant, J. M., Becq, J., Torok, M. E., Ellington, M. J., Marti-Renom, M. A., . . . Peacock, S. J. (2013). Whole-genome sequencing for rapid susceptibility testing of *M. tuberculosis*. *N Engl J Med*, *369*(3), 290-292. doi: 10.1056/NEJMc1215305
7. Manson, A. L., Cohen, K. A., Abeel, T., Desjardins, C. A., Armstrong, D. T., Barry, C. E., 3rd, . . . Earl, A. M. (2017). Genomic analysis of globally diverse *Mycobacterium tuberculosis* strains provides insights into the emergence and spread of multidrug resistance. *Nat Genet*, *49*(3), 395-402. doi: 10.1038/ng.3767
8. , A., Strong, M., Muthukrishnan, P., Weiner, B. K., Church, G. M., & Murray, M. B. (2009). Tuberculosis drug resistance mutation database. *PLoS Med*, *6*(2), e2. doi: 10.1371/journal.pmed.1000002
9. Zheng, J., Rubin, E. J., Bifani, P., Mathys, V., Lim, V., Au, M., . . . Camacho, L. R. (2013). para-Aminosalicylic acid is a prodrug targeting dihydrofolate reductase in *Mycobacterium tuberculosis*. *J Biol Chem*, *288*(32), 23447-23456. doi: 10.1074/jbc.M113.475798
10. Zaunbrecher, M. A., Sikes, R. D., Jr., Metchock, B., Shinnick, T. M., & Posey, J. E. (2009). Overexpression of the chromosomally encoded aminoglycoside acetyltransferase eis confers kanamycin resistance in *Mycobacterium tuberculosis*. *Proc Natl Acad Sci U S A*, *106*(47), 20004-20009. doi: 10.1073/pnas.0907925106
11. Dheda, K., Gumbo, T., Maartens, G., Dooley, K. E., McNerney, R., Murray, M., . . . Warren, R. M. (2017). The epidemiology, pathogenesis, transmission, diagnosis, and management of multidrug-resistant, extensively drug-resistant, and incurable tuberculosis. *Lancet Respir Med*. doi: 10.1016/S2213-2600(17)30079-6
12. Bloemberg, G.V., Gagneux, S., Böttger, E.C. (2015). Acquired Resistance to Bedaquiline and Delamanid in therapy for tuberculosis. *N Engl J Med* (373):1986-8
13. Zhang, S., Chen, J., Cui, P., Shi, W., Zhang, W., & Zhang, Y. (2015). Identification of novel mutations associated with clofazimine resistance in *Mycobacterium tuberculosis*. *J Antimicrob Chemother*, *70*(9), 2507-2510

**Table S2:** Marginal likelihood estimates from Bayesian statistical analysis to test the relaxed molecular clock under GTR model for comparison of the different demographics

| <b>Demographic model</b> | <b>Path sampling</b> | <b>Stepping stone</b> | <b>Bayes Factor</b> |
|--------------------------|----------------------|-----------------------|---------------------|
| Constant                 | 5905668              | 5905667               |                     |
| Logistic                 | 5905637              | 5905636               | 31                  |
| Exponential              | 5905636              | 5905634               | 32                  |
| Expansion                | 5905638              | 5905634               | 30                  |
| Bayesian Skyline         | 5905636              | 5905636               | 32                  |

**Figure S2:** Phylogenetic tree of Daru isolates together with global representative *M. tuberculosis* genomes (labels-black). Tree constructed using 7012 single nucleotide polymorphisms (using RAxML v.7.4.2) and rooted on *Mycobacterium bovis*. The 95 strains formed a monophyletic clade (collapse-green) among the modern Beijing sub-lineage while 5 strains were among the Euro-American lineage (labels-red and purple)

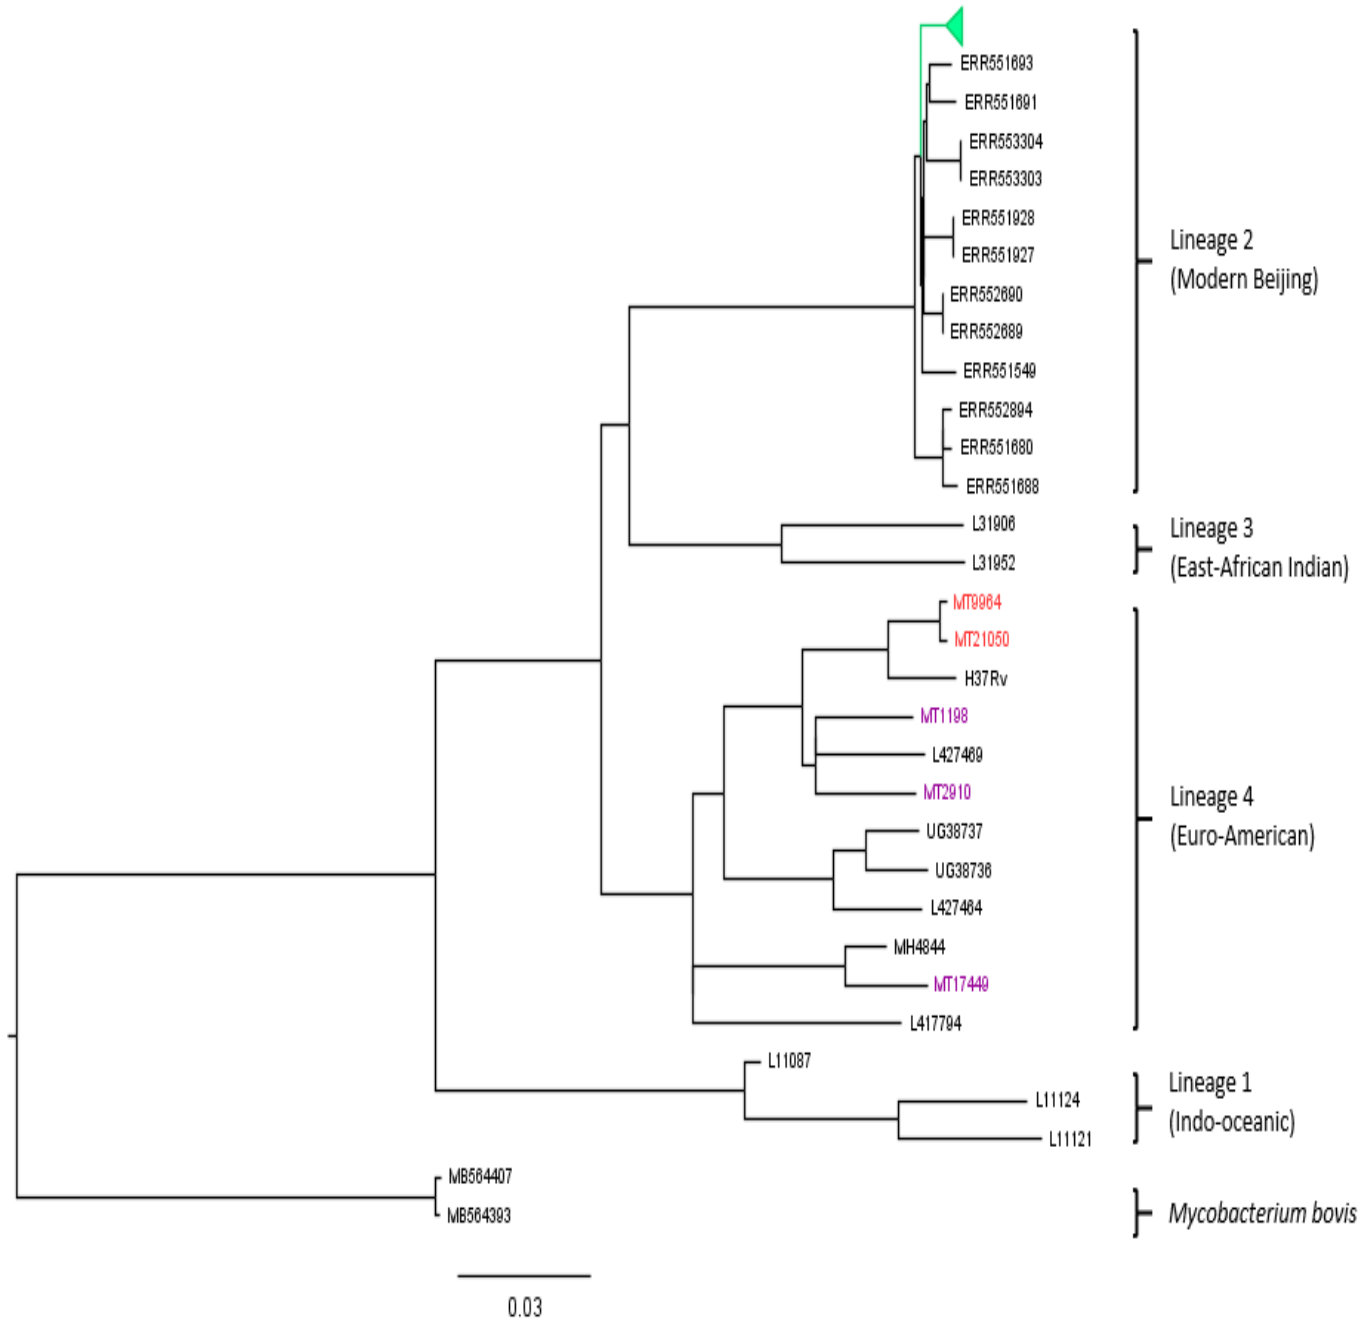

Figure S3: Pairwise SNP distance among Daru Beijing sub-lineage strains showing a unimodal distribution

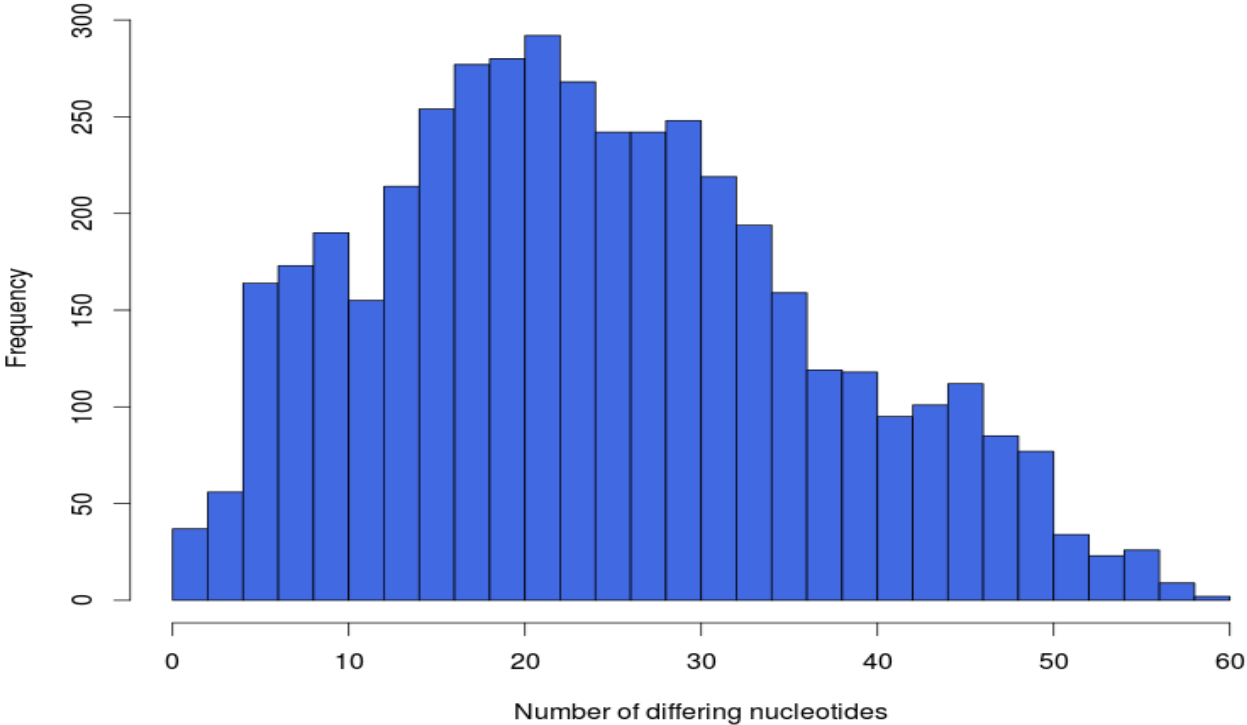

**Table S3: Lineage defined SNPs according to Coll et al (Coll et al., 2014)**

| Beijing No      | Position | Allele change | Codon change | Gene Name   | Coding     |
|-----------------|----------|---------------|--------------|-------------|------------|
| Lineage 2       | 497491   | G/A           | GAC/GAT      | <i>glnH</i> | Synonymous |
| Lineage 2.2     | 2505085  | G/A           | GCC/GCT      | <i>cobC</i> | Synonymous |
| Lineage 2.2.1   | 797736   | C/T           | CTC/CTT      | –           | Synonymous |
| Lineage 2.2.1.1 | 4248115  | C/T           | GAC/GAT      | <i>embB</i> | Synonymous |

Coll, F., McNerney, R., Guerra-Assuncao, J. A., Glynn, J. R., Perdigao, J., Viveiros, M., . . . Clark, T. G. (2014). A robust SNP barcode for typing Mycobacterium tuberculosis complex strains. *Nat Commun*, 5, 4812. doi: 10.1038/ncomms5812

**Table S4:** Unique SNPs among Daru Beijing strains that differentiate it from the nearest neighboring Modern Beijing strain among the global representative genomes

| Position | Change | Gene              | Locus          | Type of change | Amino Acid | Product                              |
|----------|--------|-------------------|----------------|----------------|------------|--------------------------------------|
| 318517   | C->T   | <i>opla</i>       | Rv0266c        | Non-synonymous | Ala880Thr  | 5-Oxoprolinase                       |
| 443264   | C->T   |                   | Rv0365c        | Non-synonymous | Val312Met  | Fructose-bisphosphate aldolase       |
| 773661   | C->T   | <i>echA4</i>      | Rv0673         | Non-synonymous | Pro180Leu  | enoyl-CoA hydratase                  |
| 799289   | C->G   |                   | Rv0698         | Non-synonymous | Arg153Gly  | Predicted ideR regulon               |
| 971200   | T->C   | <i>fadE10</i>     | Rv0873         | Synonymous     | phe232phe  | Acyl-CoA dehydrogenase               |
| 1140664  | T->G   | <i>mfd</i>        | Rv1020         | Synonymous     | Thr566Thr  | Transcription-repair coupling factor |
| 1293748  | C->G   | <i>narI</i>       | Rv1164         | Non-synonymous | Arg115Gly  | Nitrate reductase                    |
| 1310874  | C->T   |                   | Rv1179c        | Non-synonymous | Gly809Asp  |                                      |
| 1422353  | G->T   |                   | Rv1273c        | Synonymous     | Ala566Ala  | ABC transporter ATP binding protein  |
| 1596224  | C->T   |                   | Rv1421         | Synonymous     | Thr82Thr   | Nucleotide binding protein           |
| 1820488  | G->A   | <i>cydC</i>       | Rv1620c        | Synonymous     | Asp402Asp  | ABC transporter ATP binding protein  |
| 2161210  | G->A   | <i>aceAa</i>      | Rv1915         | Non-synonymous | Val250Ile  | Isocitrate lyase                     |
| 2588998  | C->G   | <i>uspA</i>       | Rv2316         | Non-synonymous | Thr54Ser   | ABC transporter permease UspA        |
| 2595702  | C->G   |                   | Rv2323c        | Non-synonymous | Val190Leu  |                                      |
| 2711499  | G->A   |                   | Rv2414c        | Non-synonymous | Pro460Ser  |                                      |
| 2937218  | G->A   |                   | Rv2609c        | Synonymous     | Thr216Thr  | Exppolyphosphatase                   |
| 2955138  | C->T   |                   | Rv2628         | Synonymous     | Gly27Gly   | Uncharacterized protein              |
| 2974938  | G->T   |                   | Rv2650         | Synonymous     | Arg99Arg   |                                      |
| 3013291  | G->A   |                   | Rv2696c        | Synonymous     | Arg106Arg  |                                      |
| 3248028  | G->A   | <i>ppsA</i>       | Rv2931         | Non-synonymous | Val862Ile  | polyketide synthase type1            |
| 3505648  | C->G   | <i>fadE24</i>     | Rv3139         | Non-synonymous | Arg96Gly   | Acyl-CoA dehydrogenase               |
| 3618435  | G->T   | <i>secA1</i>      | Rv3240c        | Non-synonymous | Asp699Glu  | Protein translocase subunit          |
| 3660529  | C->A   |                   | Rv3277         | Non-synonymous | Leu218Met  |                                      |
| 3716646  | G->A   | <i>dacB1</i>      | Rv3330         | Synonymous     | Gly290Gly  | D-amyl-D-alanine carboxypeptidase    |
| 3772657  | C->T   |                   | Rv3360         | Stop Gained    | Arg3*      | Predicted-Forkhead-Associated domain |
| 3838972  | C->A   | <i>rimI</i>       | Rv3420c        | Non-synonymous | Gly31Cys   | alanine acetyltransferase            |
| 3876935  | G->A   | <i>rplQ</i>       | Rv3456c        | Synonymous     | Asp166Asp  | 50S ribosomal protein L17            |
| 3922552  | C->T   | <i>fadE26</i>     | Rv3504         | Non-synonymous | Arg28Cys   | Acyl-CoA dehydrogenase               |
| 4016415  | C->T   | <i>fad34-kstR</i> | Rv3573c-Rv3574 | Intergenic     |            |                                      |
| 4245131  | G->A   | <i>emBA</i>       | Rv3794         | Synonymous     | Pro633Pro  | Arabinosyl transferase A             |
| 4278559  | C->T   |                   | Rv3813c        | Synonymous     | Val219Val  |                                      |
| 4335119  | C->T   | <i>gltB</i>       | Rv3859c        | Synonymous     | Glu321Glu  | Glutamate synthase                   |



**Table S5:** Polymorphisms that are specific to Beijing lineage outbreak cluster Clade B, C and D

| <b>Position</b> | <b>Nucleotide change</b> | <b>Gene</b>  | <b>Amino Acid</b> | <b>Type of change</b> |
|-----------------|--------------------------|--------------|-------------------|-----------------------|
| 635725          | G->T                     | Rv0543c      | Leu51Ile          | Non-synonymous        |
| 781687          | A->G                     | <i>rpsL</i>  | Lys43Arg          | Non-synonymous        |
| 844023          | T->C                     | <i>fadE9</i> | Asp131Gly         | Non-synonymous        |
| 950508          | AGC->A                   | <i>pdv</i>   | Rv0853c           | frameshift            |
| 1595966         | CG->C                    | <i>uvrC</i>  | Rv1420            | frameshift            |
| 1611757         | C->T                     | Rv1433       | Ser108Ser         | synonymous            |
| 3015445         | C->T                     | Rv2700       | Thr81Thr          | synonymous            |
| 3292835         | G->C                     | <i>pks1</i>  | Ala1173Ala        | synonymous            |
| 3375035         | C->T                     | Rv3015c      | Ala210Ala         | synonymous            |
| 4364046         | T->C                     | <i>mycp1</i> | Thr238Ala         | Non-synonymous        |

**Figure S4:** Sequence reads mapped of the *H37Rv* reference showing two *rpoB* mutations known to confer rifampicin resistance. The orange mutation (p.Ile480Val) is outside the 81 bp rifampicin resistance determining region.

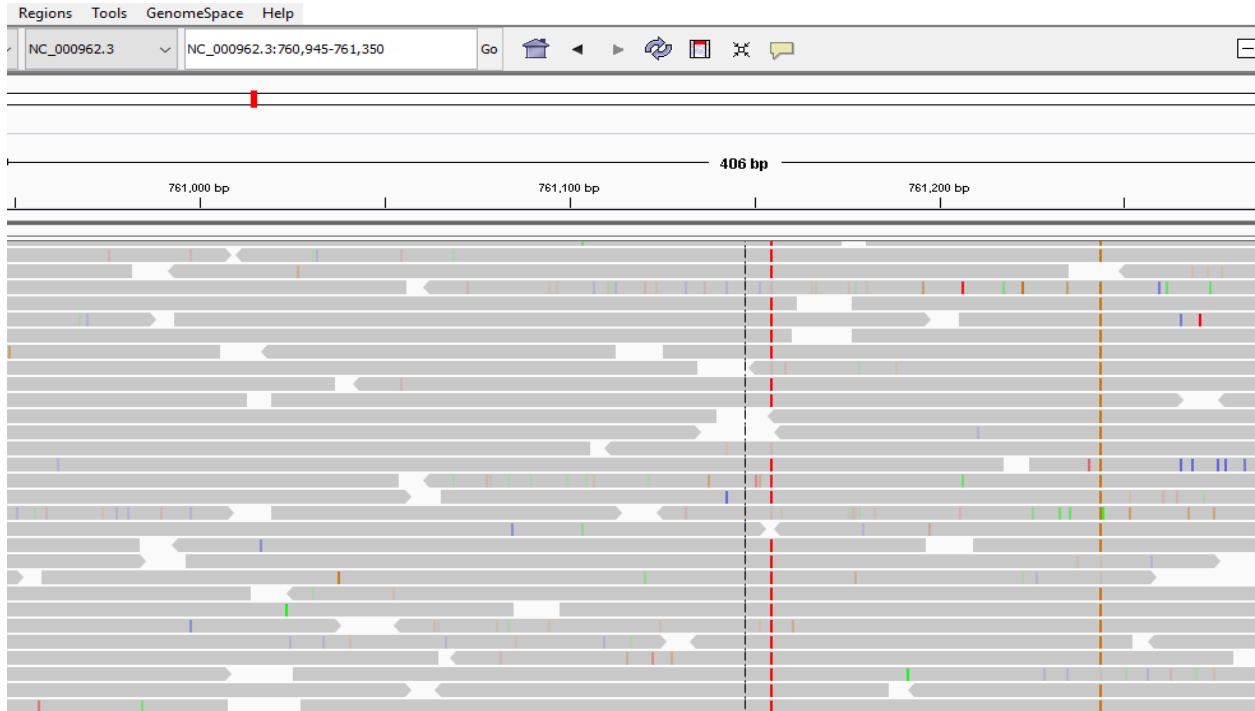

**Figure S5:** Sequence reads mapped on *H37Rv* reference genome spanning the *rpoB* gene (759807- 763325) but without any observable mutation at sequence depth of X75

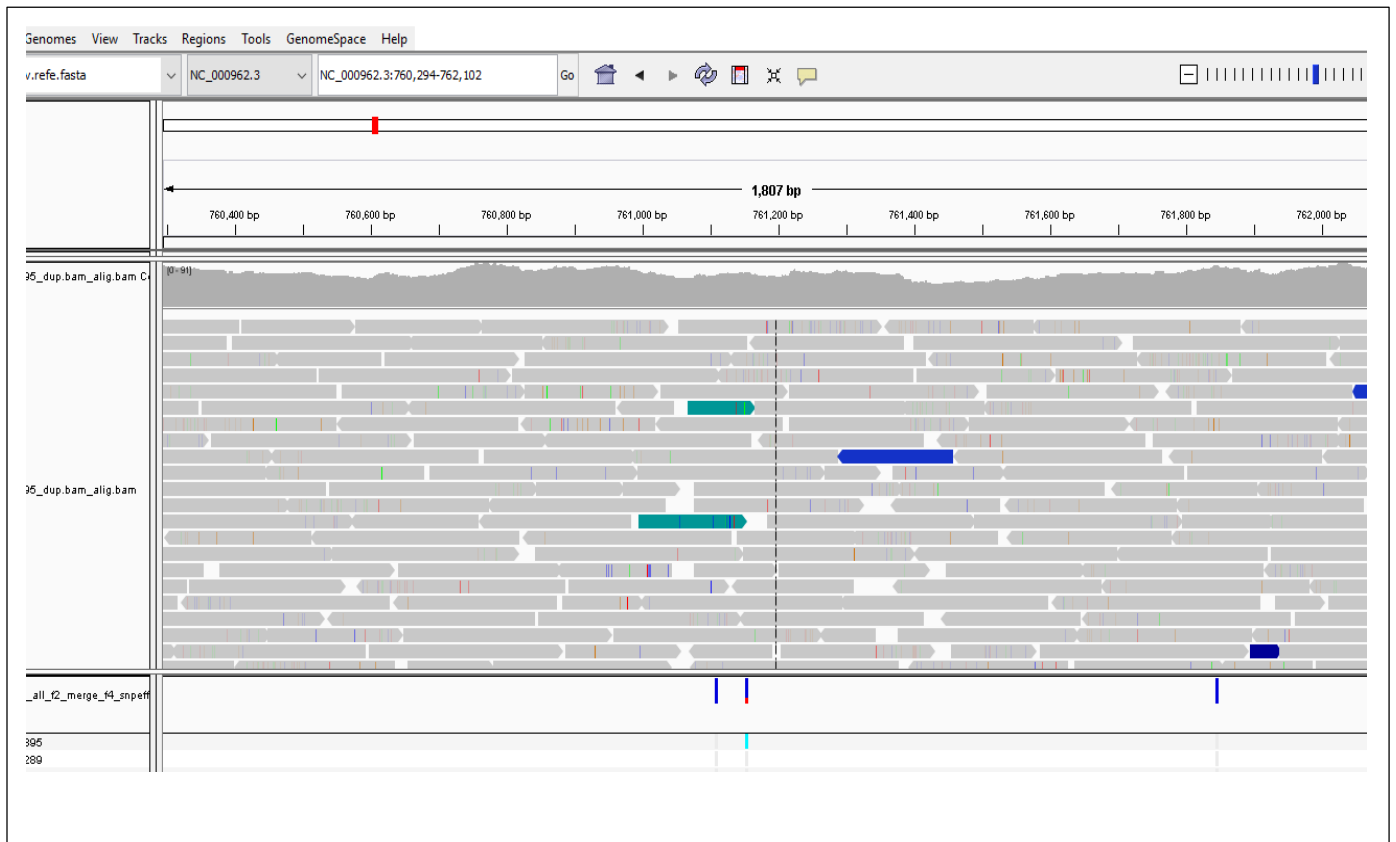

**Figure S6:** Sequence reads mapped onto *H37Rv* reference indicating a deletion (2287064-2291054) spanning *pncA* gene among two pyrazinamide resistant Beijing strains

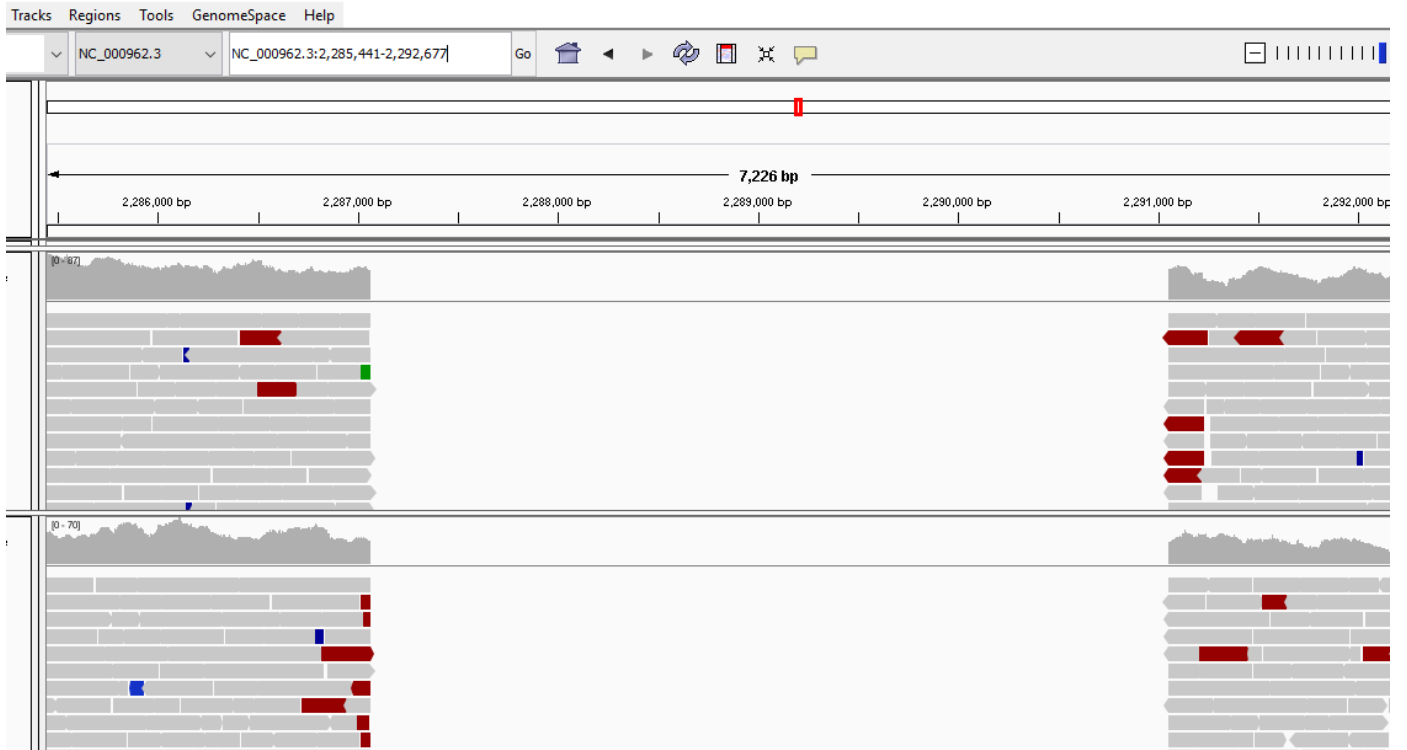

**Figure S7:** Interaction of genes with SNPs known to confer XDR resistance among Beijing sub-lineage strains

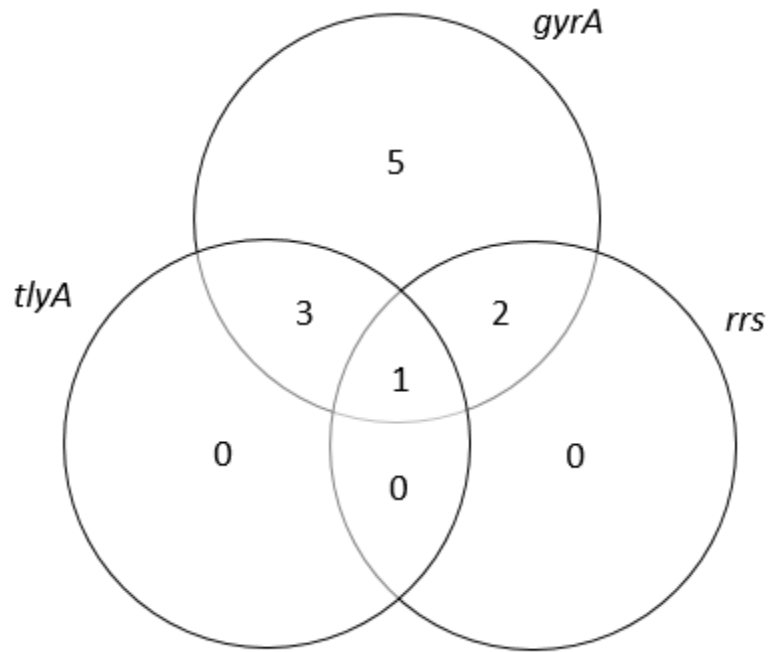

**Figure S8:** Transmission networks constructed using SeqTrack for clades C and D, showing the SNP distances (branch numbers). Each circle represents an isolate while larger ones represent two or three isolates with similar sequences. Green circle/blue outline-MDR, green circle/red outline-pre-XDR, red circle-XDR and blue circle-susceptible isolates. Dashed shaped lines represent identified clusters of directly linking isolates

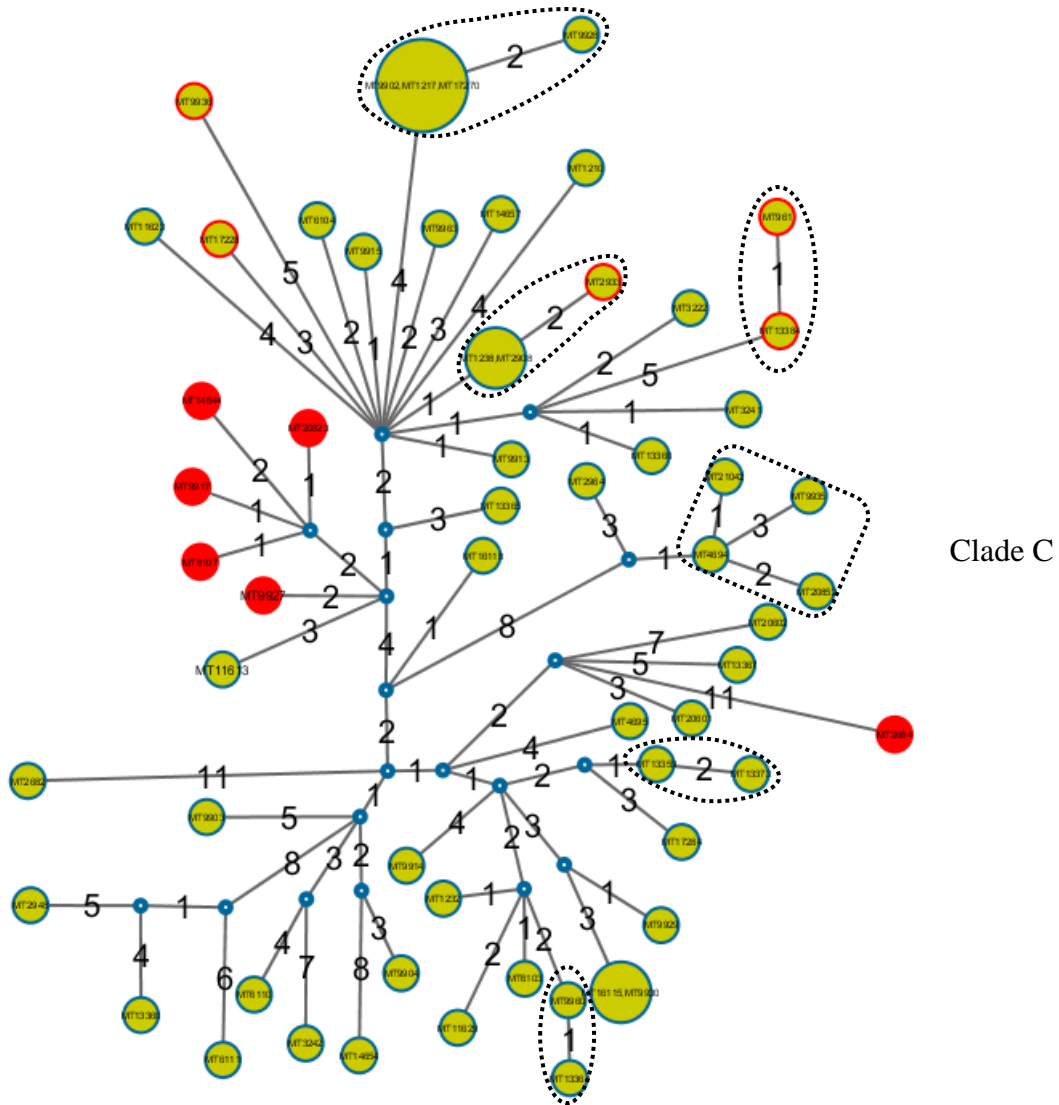

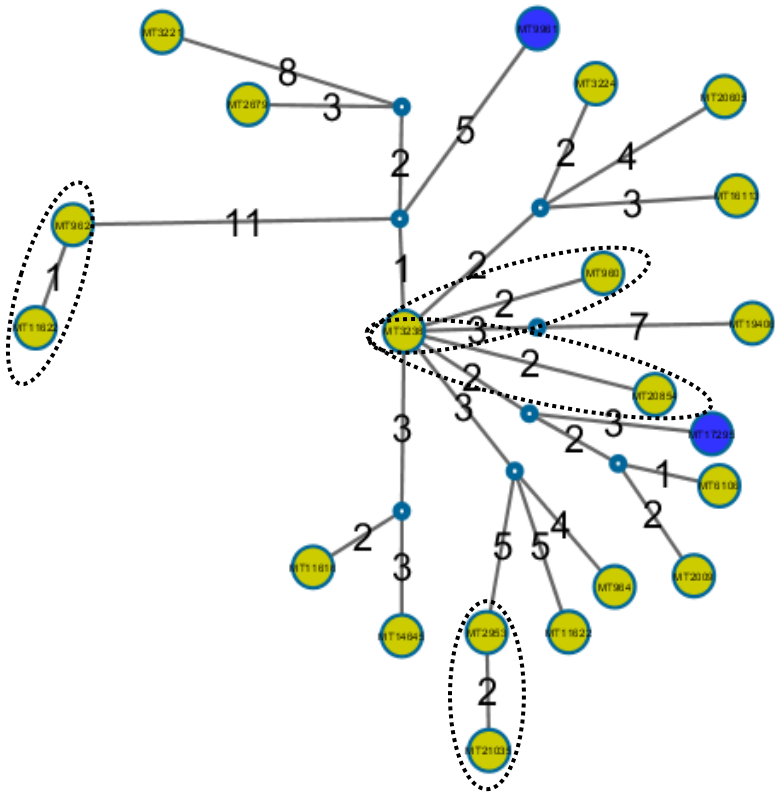

Clade D
